# Supplementary material for: CFTR Knockdown induces proinflammatory changes in intestinal epithelial cells
Source: PubMed Central journal article supplement (PMC4636765; doi:10.1186/s12950-015-0107-y), 2015-11-07
Supplement: 12950_2015_107_MOESM3_ESM.pdf [file 12950_2015_107_MOESM3_ESM.pdf]

### Additional file 3. Cell viability of HT-29 cells exposed to the various experimental conditions

| Experimental conditions | Untreated     | Treated with pro-inflammatory agents |               |
|-------------------------|---------------|--------------------------------------|---------------|
|                         |               | TNF- $\alpha$                        | IL-1 $\beta$  |
| <b>Non-infected</b>     | 93 $\pm$ 3.03 | 90 $\pm$ 3.36                        | 94 $\pm$ 0.32 |
| <b>Scrambled</b>        | 96 $\pm$ 0.90 | 93 $\pm$ 0.37                        | 92 $\pm$ 1.46 |
| <b>CFTR knockdown</b>   | 92 $\pm$ 1.81 | 92 $\pm$ 1.23                        | 90 $\pm$ 2.87 |

Cell viability of HT-29 cells was assessed with the Trypan blue exclusion method. All treatments were 24 h in duration and the dose of TNF and IL-1 $\beta$  used was 10ng/ml. Results are indicated as percentages. Data represent the means $\pm$ SEM of three experiments. Results are non-significant.
