# Supplementary material for: CFTR Knockdown induces proinflammatory changes in intestinal epithelial cells
Source: Springer Nature journal article supplement (doi:10.1186/s12950-015-0107-y), 2015-11-06
Supplement: MOESM1 [file 9763720]

**Additional file 1. Cell viability of Caco-2/15 cells exposed to the various experimental conditions**

| Experimental conditions | Untreated     | Treated with pro-inflammatory agents |               |
|-------------------------|---------------|--------------------------------------|---------------|
|                         |               | TNF- $\alpha$                        | IL-1 $\beta$  |
| <b>Non-infected</b>     | 96 $\pm$ 0.53 | 95 $\pm$ 1.50                        | 92 $\pm$ 1.40 |
| <b>Scrambled</b>        | 94 $\pm$ 1.49 | 95 $\pm$ 1.00                        | 95 $\pm$ 0.58 |
| <b>CFTR knockdown</b>   | 95 $\pm$ 1.18 | 93 $\pm$ 2.99                        | 96 $\pm$ 0.15 |
| <b>Forskolin/IBMX</b>   | 81 $\pm$ 2.3# | 89 $\pm$ 0.26                        | 91 $\pm$ 2.11 |

Cell viability of Caco-2/15 cells was assessed with the Trypan blue exclusion method. All treatments were 24 h in duration and the dose of TNF and IL-1 $\beta$  used was 25 ng/mL. Results are indicated as percentages. Data represent the means $\pm$ SEM of three experiments. #p<0.05 vs. non-infected cells.
